# Supplementary material for: Establishment of Human Leukocyte Antigen-Mismatched Immune Responses after Transplantation of Human Liver Bud in Humanized Mouse Models
Source: Cells. 2021 Feb 23;10(2):476. doi: 10.3390/cells10020476 (PMC7927063; doi:10.3390/cells10020476)
Supplement: Supplementary file 1 [file cells-10-00476-s001.pdf]

Supplemental Figure 1.

a

| Marker  | Chr. | Position (kb) | C7H/1Jth | NOG/2N | 5  | 7  | 10 | 14 | 16 | 19 | 20 | 21 | 26 | 38 | 39 | 41 | 44 | 49 | 51 |
|---------|------|---------------|----------|--------|----|----|----|----|----|----|----|----|----|----|----|----|----|----|----|
| D1M101  | 1    | 39.51         | re       | re     | NO |
| D1M132  | 1    | 39.51         | re       | re     | NO |
| D1M102  | 1    | 63.32         | re       | re     | NO |
| D1M459  | 1    | 91.86         | re       | re     | NO |
| D2M1    | 2    | 2.23          | re       | re     | NO |
| D2M182  | 2    | 39.53         | re       | re     | NO |
| D2M311  | 2    | 86.02         | re       | re     | NO |
| D2M246  | 2    | 100.94        | re       | re     | NO |
| D3M149  | 3    | 1.96          | re       | re     | NO |
| D3M25   | 3    | 27.32         | re       | re     | NO |
| D3M103  | 3    | 60.79         | re       | re     | NO |
| D3M89   | 3    | 80.79         | re       | re     | NO |
| D3M272  | 4    | 4.43          | re       | re     | NO |
| D4M25   | 4    | 52.62         | re       | re     | NO |
| D4M256  | 4    | 66.16         | re       | re     | NO |
| D5M146  | 5    | 3.43          | re       | re     | NO |
| D5M18   | 5    | 38.44         | re       | re     | NO |
| D5M397  | 5    | 60.43         | re       | re     | NO |
| D5M97   | 5    | 76.10         | re       | re     | NO |
| D6M86   | 6    | 1.81          | re       | re     | NO |
| D6M284  | 6    | 41.11         | re       | re     | NO |
| D6M304  | 6    | 78.22         | re       | re     | NO |
| D7M267  | 7    | 17.09         | re       | re     | NO |
| D7M350  | 7    | 47.43         | re       | re     | NO |
| D7M189  | 7    | systemic      | re       | re     | NO |
| D8M155  | 8    | 2.14          | re       | re     | NO |
| D8M191  | 8    | 21.16         | re       | re     | NO |
| D8M88   | 8    | 61.66         | re       | re     | NO |
| D9M83   | 9    | 8.99          | re       | re     | NO |
| D9M103  | 9    | 27.72         | re       | re     | NO |
| D9M25   | 9    | 72.59         | re       | re     | NO |
| D10M25  | 10   | 3.78          | re       | re     | NO |
| D10M31  | 10   | 63.23         | re       | re     | NO |
| D10M266 | 10   | systemic      | re       | re     | NO |
| D11M21  | 11   | 25.64         | re       | re     | NO |
| D11M67  | 11   | 60.47         | re       | re     | NO |
| D11M48  | 11   | 82.86         | re       | re     | NO |
| D12M109 | 12   | 18.64         | re       | re     | NO |
| D12M156 | 12   | 35.70         | re       | re     | NO |
| D12M133 | 12   | 60.56         | re       | re     | NO |
| D13M132 | 13   | systemic      | re       | re     | NO |
| D13M13  | 13   | 30.06         | re       | re     | NO |
| D13M51  | 13   | 56.45         | re       | re     | NO |
| D14M23  | 14   | 26.83         | re       | re     | NO |
| D14M225 | 14   | 39.46         | re       | re     | NO |
| D15M13  | 15   | 1.84          | re       | re     | NO |
| D15M171 | 15   | 45.02         | re       | re     | NO |
| D15M42  | 15   | 55.72         | re       | re     | NO |
| D16M129 | 16   | 2.71          | re       | re     | NO |
| D16M119 | 16   | 37.28         | re       | re     | NO |
| D16M106 | 16   | 57.69         | re       | re     | NO |
| D17M223 | 17   | 2.66          | re       | re     | NO |
| D17M103 | 17   | 28.67         | re       | re     | NO |
| D17M35  | 17   | 45.50         | re       | re     | NO |
| D18M12  | 18   | 19.59         | re       | re     | NO |
| D18M91  | 18   | 29.67         | re       | re     | NO |
| D18M187 | 18   | 50.99         | re       | re     | NO |
| D19M478 | 19   | 5.33          | re       | re     | NO |
| D19M14  | 19   | 14.32         | re       | re     | NO |
| D19M103 | 19   | 48.46         | re       | re     | NO |
| D20M25  | X    | 3.31          | re       | re     | NO |
| D20M25  | X    | 36.78         | re       | re     | NO |
| D20M121 | X    | 73.55         | re       | re     | NO |

Supplemental Figure S1. NOG-HLA-A2Tg mice microsatellite screening. No7 strain was replacement of the genetic background from B6 to NOD was confirmed.
